# Supplementary material
Source: Springer Nature journal article supplement (https://www.springermedizin.de/resource/supplementary/12984_2012_517_MOESM5_ESM.pdf/9604766)

**Subject 1**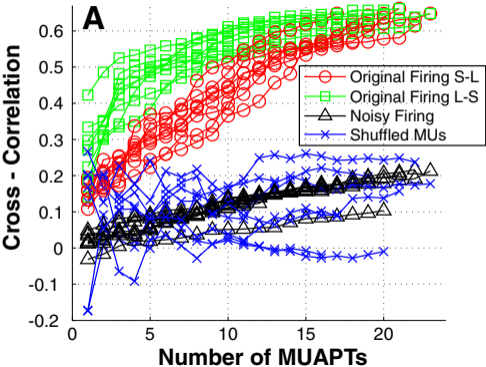**Subject 2**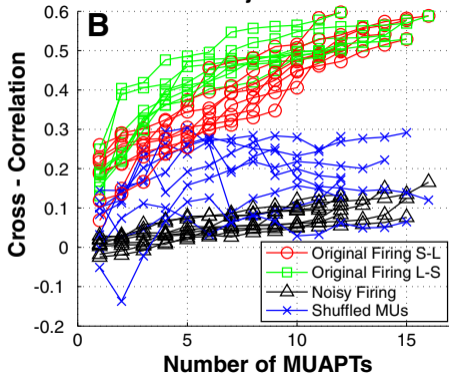**C**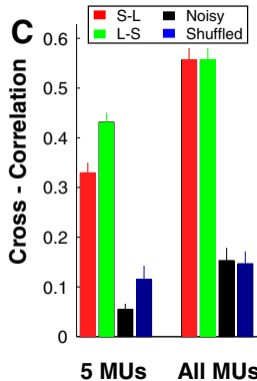

Supplement: MOESM5 [file 9604766]
